# Supplementary material
Source: publisher figshare collection journal article supplement (https://asha.figshare.com/ndownloader/files/38698482)

**Supplemental Material S1.** The proportion of fixations to the target and distractor during the prenaming phase of correctly pronounced words (CP; Trials 5, 7, 8, 13, and 18) and mispronounced words (MP; Trials 3, 6, 10, 12, and 14) trials for each of the two conditions across both days (No Restrictor Day 1 and Day 2 [NR1, NR2], Restrictor Day 1 and Day 2 [R1, R2]) and two diagnosis groups (children with speech sound disorder [SSD], children with typical development [TD]).

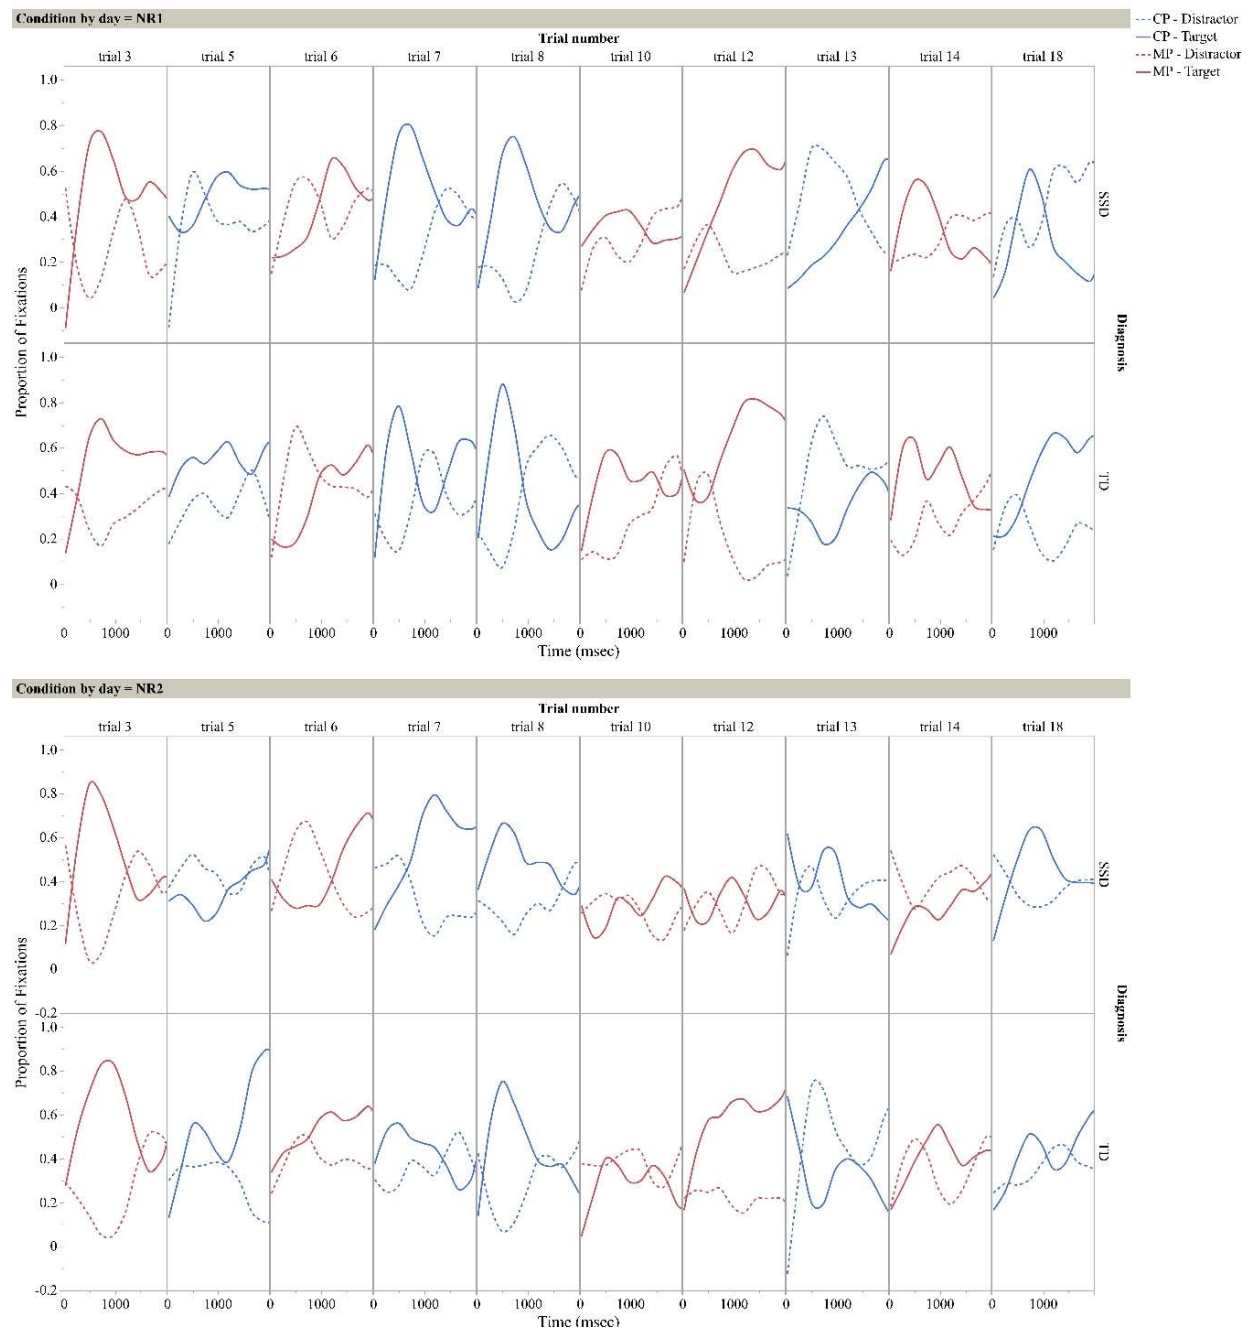

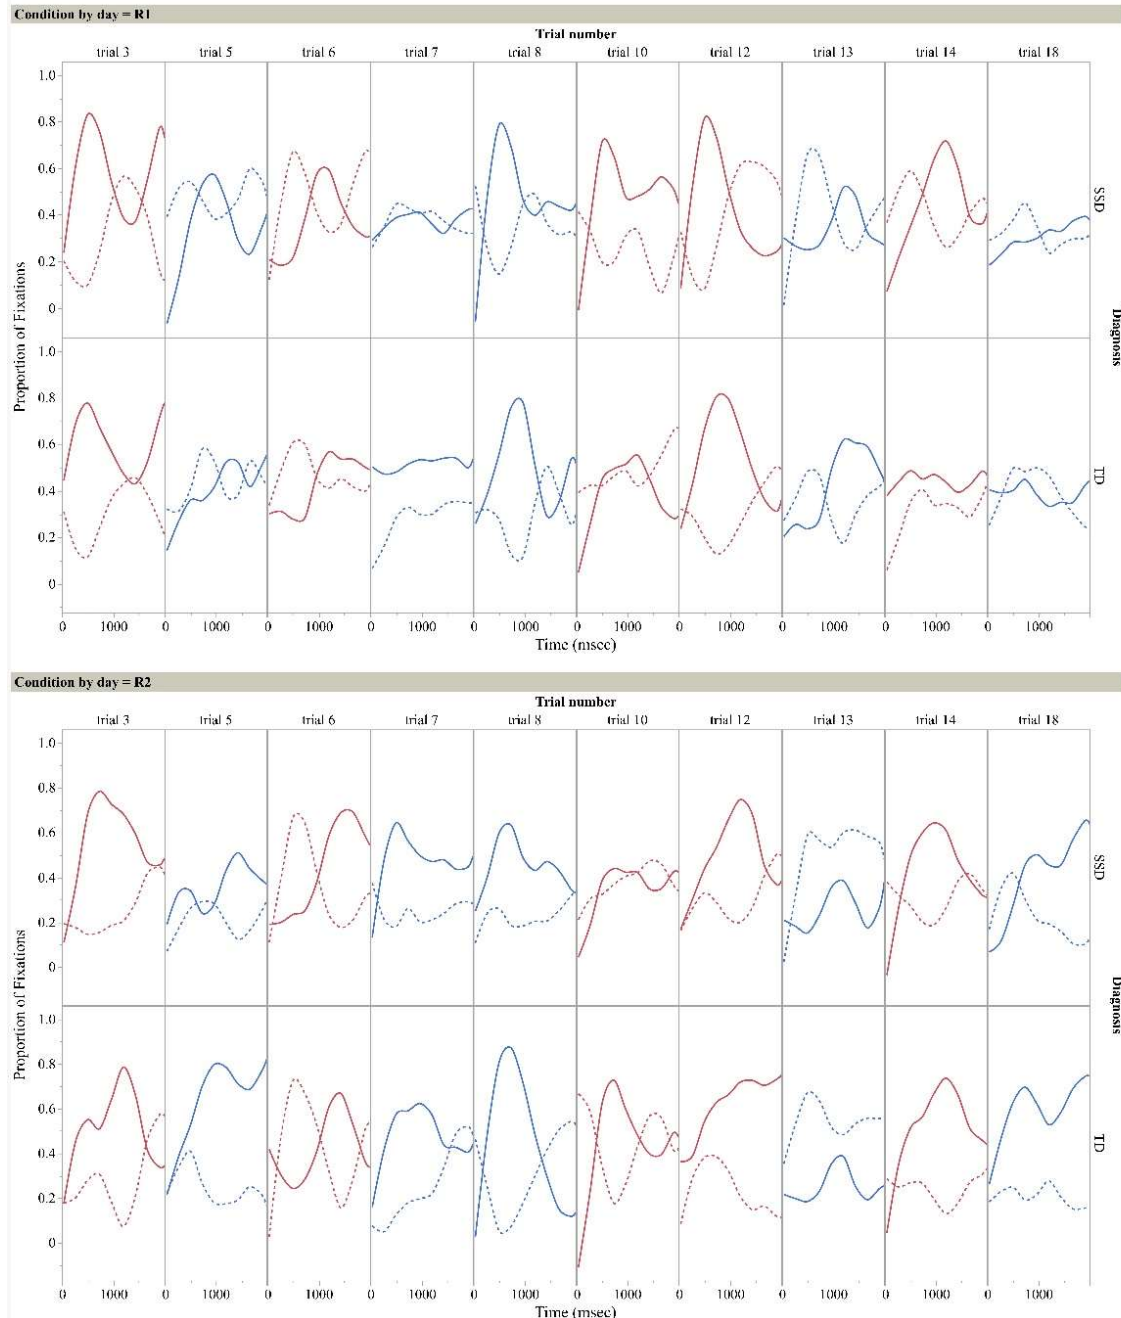

Supplement: Supplementary file 1 [file 38698482]
